# Supplementary material for: Exploring the Anticancer Potential of Premna resinosa (Hochst.) Leaf Surface Extract: Discovering New Diterpenes as Heat Shock Protein 70 (Hsp70) Binding Agents
Source: MDPI journal article supplement (doi:10.3390/plants12132421), 2023-06-22
Supplement: s1 [file s1]

Supplementary Materials

# Exploring the Anticancer Potential of *Premna resinosa* (Hochst.) Leaf Surface Extract: Discovering New Diterpenes as Heat Shock Protein 70 (Hsp70) Binding Agents

Valentina Parisi <sup>1</sup>, Giuliana Donadio <sup>1</sup>, Maria Laura Bellone <sup>1</sup>, Soumia Belaabed <sup>2</sup>, Ammar Bader <sup>3</sup>, Angela Bisio <sup>4</sup>, Valeria Iobbi <sup>4</sup>, Erica Gazzillo <sup>1</sup>, Maria Giovanna Chini <sup>5</sup>, Giuseppe Bifulco <sup>1</sup>, Immacolata Faraone <sup>6,7</sup> and Antonio Vassallo <sup>6,8,\*</sup>

- <sup>1</sup> Department of Pharmacy, University of Salerno, Via Giovanni Paolo II 132, 84084 Fisciano, Italy; vparisi@unisa.it (V.P.); gdonadio@unisa.it (G.D.); mbellone@unisa.it (M.L.B.); egazzillo@unisa.it (E.G.); bifulco@unisa.it (G.B.)
  - <sup>2</sup> Department of Chemistry, Research Unit, Development of Natural Resources, Bioactive Molecules Physicochemical and Biological Analysis, University Brothers Mentouri, Route Ain ElBey, Constantine 25000, Algeria; soumia.belaabed@umc.edu.dz
  - <sup>3</sup> Department of Pharmacognosy, Faculty of Pharmacy, Umm Al-Qura University, Makkah 21955, Saudi Arabia; ambader@uqu.edu.sa
  - <sup>4</sup> Department of Pharmacy, University of Genova, Viale Cembrano 4, 16148 Genova, Italy; bisio@difar.unige.it (A.B.); valeria.iobbi@edu.unige.it (V.I.)
  - <sup>5</sup> Department of Biosciences and Territory, University of Molise, C.da Fonte Lappone, 86090 Pesche, Italy; mariagiovanna.chini@unimol.it
  - <sup>6</sup> Department of Science, University of Basilicata, Viale dell'Ateneo Lucano 10, 85100 Potenza, Italy; immacolata.faraone@unibas.it
  - <sup>7</sup> Innovative Startup Farmis s.r.l., Via Nicola Vaccaro 40, 85100 Potenza, Italy
  - <sup>8</sup> Spinoff TNCKILLERS s.r.l., Viale dell'Ateneo Lucano 10, 85100 Potenza, Italy
- \* Correspondence: antonio.vassallo@unibas.it; Tel.: +39-0971205624

**Citation:** Parisi, V.; Donadio, G.; Bellone, M.L.; Belaabed, S.; Bader, A.; Bisio, A.; Iobbi, V.; Gazzillo, E.; Chini, M.G.; Bifulco, G.; et al.

Exploring the Anticancer Potential of *Premna resinosa* (Hochst.) Leaf Surface Extract: Discovering New Diterpenes as Heat Shock Protein 70 (Hsp70) Binding Agents. *Plants* **2023**, *12*, 2421. <https://doi.org/10.3390/10.3390/plants12132421>

Academic Editor: Maria José U. Ferreira

Received: 16 May 2023

Revised: 12 June 2023

Accepted: 20 June 2023

Published: 22 June 2023

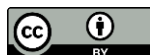

**Copyright:** © 2023 by the authors. Submitted for possible open access publication under the terms and conditions of the Creative Commons Attribution (CC BY) license (<https://creativecommons.org/licenses/by/4.0/>).

**Figure S1.**  $^1\text{H}$  NMR spectrum of compound **1** ( $\text{CD}_3\text{OD}$ , 600 MHz).  
**Figure S2.**  $^{13}\text{C}$  NMR spectrum of compound **1** ( $\text{CD}_3\text{OD}$ , 600 MHz).  
**Figure S3.** COSY spectrum of compound **1** ( $\text{CD}_3\text{OD}$ , 600 MHz).  
**Figure S4.** HSQC spectrum of compound **1** ( $\text{CD}_3\text{OD}$ , 600 MHz).  
**Figure S5.** HMBC spectrum of compound **1** ( $\text{CD}_3\text{OD}$ , 600 MHz).  
**Figure S6.** NOESY spectrum of compound **1** ( $\text{CD}_3\text{OD}$ , 600 MHz)**Figure S7.** HRESIMS of compound **1**.  
**Figure S8.**  $^1\text{H}$  NMR spectrum of compound **2** ( $\text{CD}_3\text{OD}$ , 600 MHz).  
**Figure S9.**  $^{13}\text{C}$  NMR spectrum of compound **2** ( $\text{CD}_3\text{OD}$ , 600 MHz).  
**Figure S10.** COSY spectrum of compound **2** ( $\text{CD}_3\text{OD}$ , 600 MHz).  
**Figure S11.** HSQC spectrum of compound **2** ( $\text{CD}_3\text{OD}$ , 600 MHz).  
**Figure S12.** HMBC spectrum of compound **2** ( $\text{CD}_3\text{OD}$ , 600 MHz).  
**Figure S13.** HRESIMS of compound **2**.  
**Figure S14.** 2D structures of investigated stereoisomers of **1** and **4**.  
**Figure S15.** Binding pose and interaction of **3** docked to Hsp70 ATP binding site.  
**Figure S16.** Molecular dynamic simulation results.

**Table S1.**  $^1\text{H}$  experimental and calculated NMR chemical shifts for **1a-b**, with  $^a|\Delta\delta|(^1\text{H})$  and  $^c\text{MAE}$  values. Chemical shift data here reported were produced using benzene as reference compound for  $\text{sp}^2$  hydrogens, and tetramethylsilane (TMS) for  $\text{sp}^3$  hydrogens.

**Table S2.**  $^{13}\text{C}$  experimental and calculated NMR chemical shifts for **1a-b**, with  $^a|\Delta\delta|(^{13}\text{C})$  and  $^b\text{MAE}$  values. Chemical shift data here reported were produced using benzene as reference compound for  $\text{sp}^2$  carbons, and tetramethylsilane (TMS) for  $\text{sp}^3$  carbons.

**Table S3.**  $^1\text{H}$  experimental and calculated NMR chemical shifts for **4a-d**, with  $^a|\Delta\delta|(^1\text{H})$  and  $^c\text{MAE}$  values. Chemical shift data here reported were produced using benzene as reference compound for  $\text{sp}^2$  hydrogens, and tetramethylsilane (TMS) for  $\text{sp}^3$  hydrogens.

**Table S4.**  $^{13}\text{C}$  experimental and calculated NMR chemical shifts for **4a-d**, with  $^a|\Delta\delta|(^{13}\text{C})$  and  $^b\text{MAE}$  values. Chemical shift data here reported were produced using benzene as reference compound for  $\text{sp}^2$  carbons, and tetramethylsilane (TMS) for  $\text{sp}^3$  carbons.

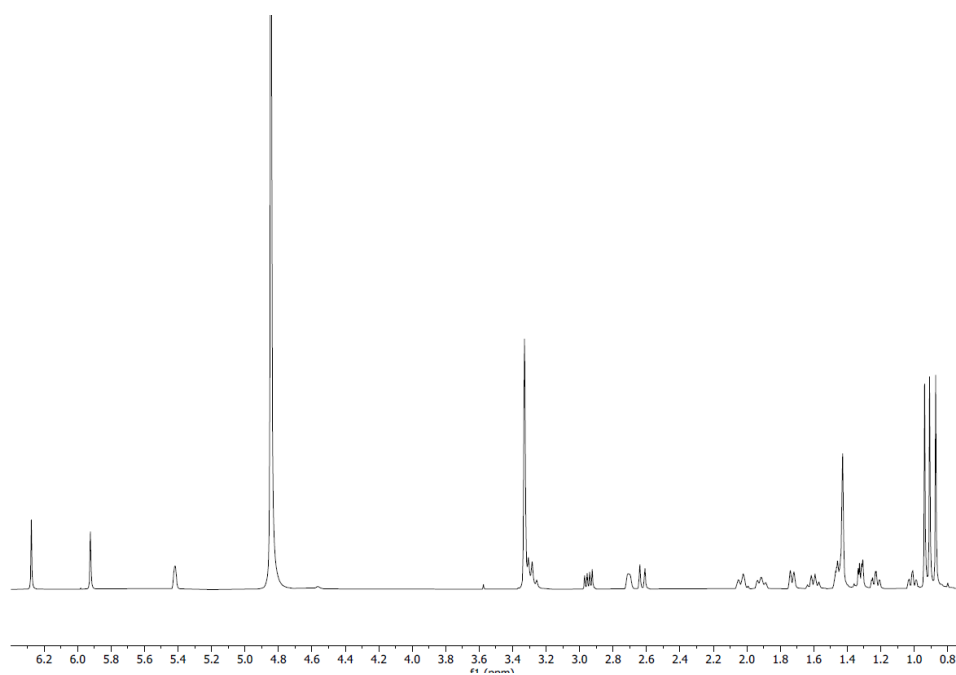

Figure S1.  $^1\text{H}$  NMR spectrum of compound 1 ( $\text{CD}_3\text{OD}$ , 600 MHz).

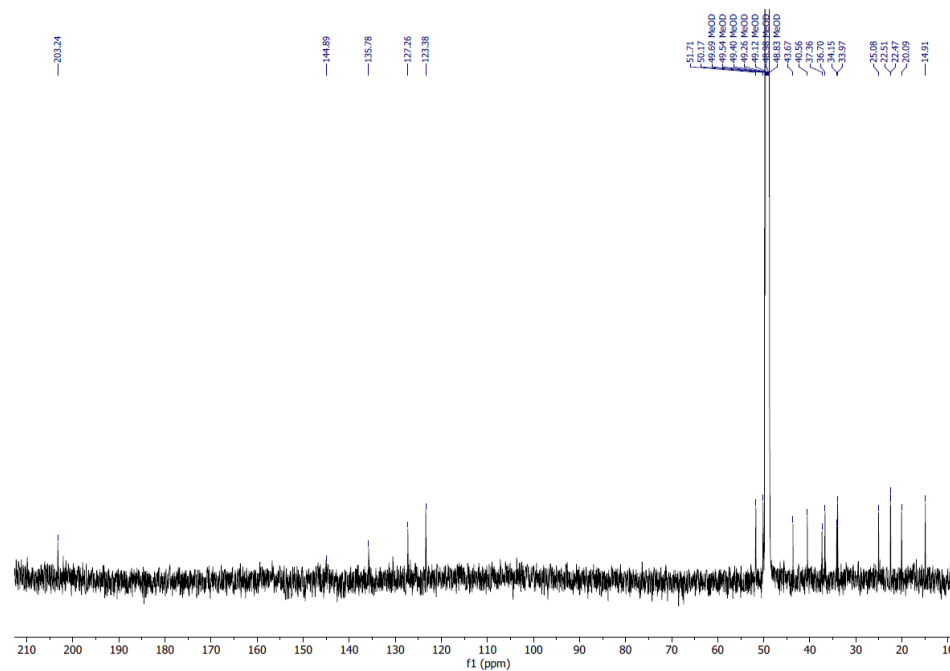

Figure S2.  $^{13}\text{C}$  NMR spectrum of compound 1 ( $\text{CD}_3\text{OD}$ , 600 MHz).

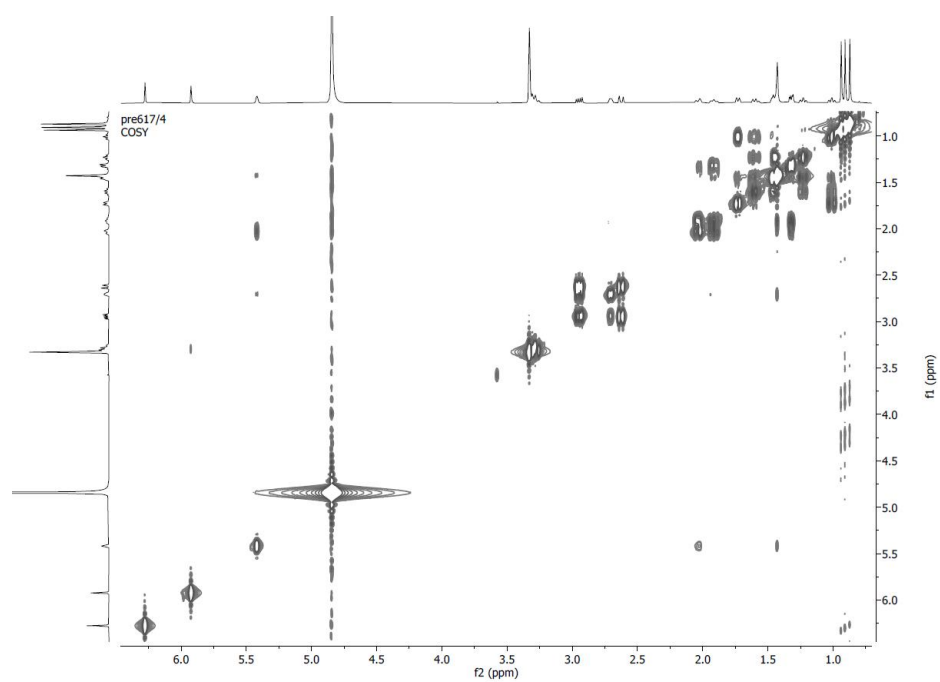

Figure S3. COSY spectrum of compound 1 (CD<sub>3</sub>OD, 600 MHz).

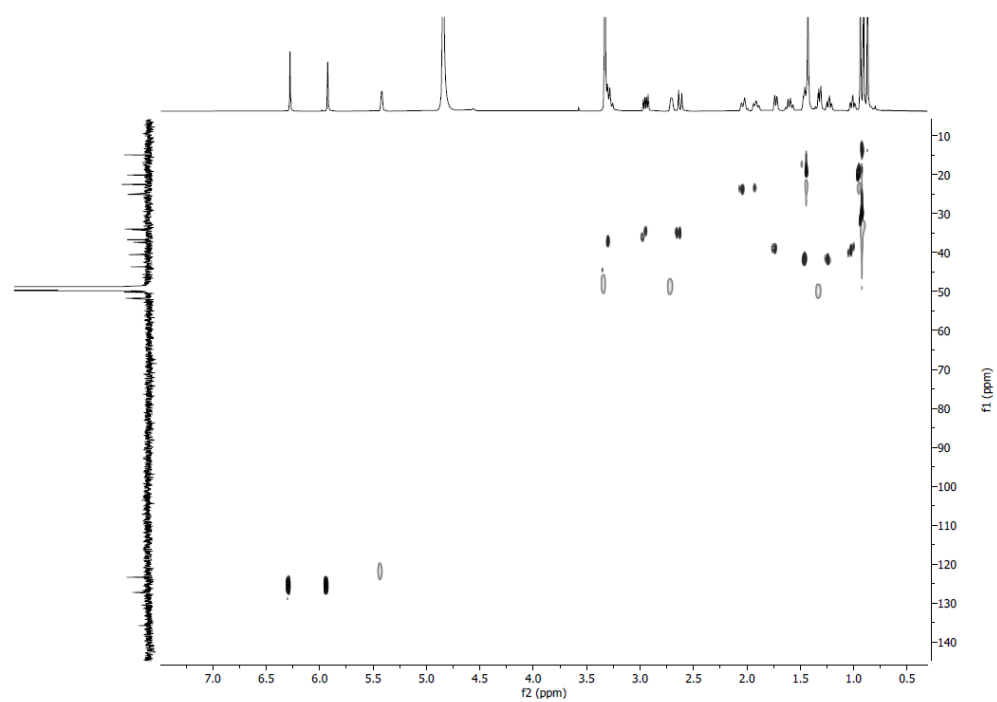

Figure S4. HSQC spectrum of compound 1 (CD<sub>3</sub>OD, 600 MHz).

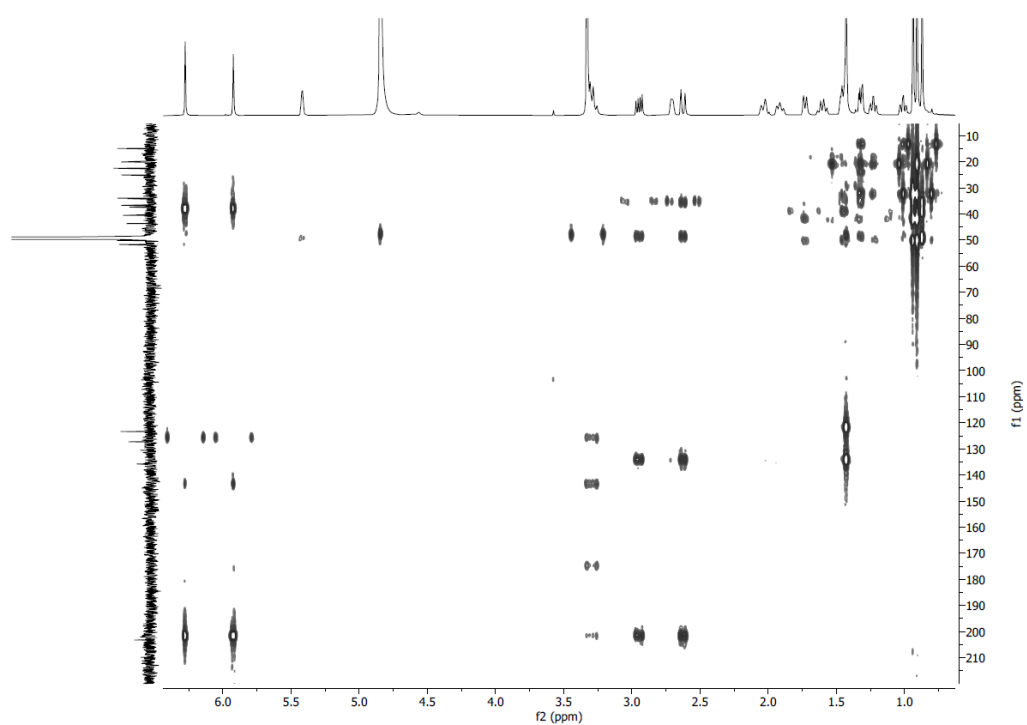

Figure S5. HMBC spectrum of compound 1 (CD<sub>3</sub>OD, 600 MHz).

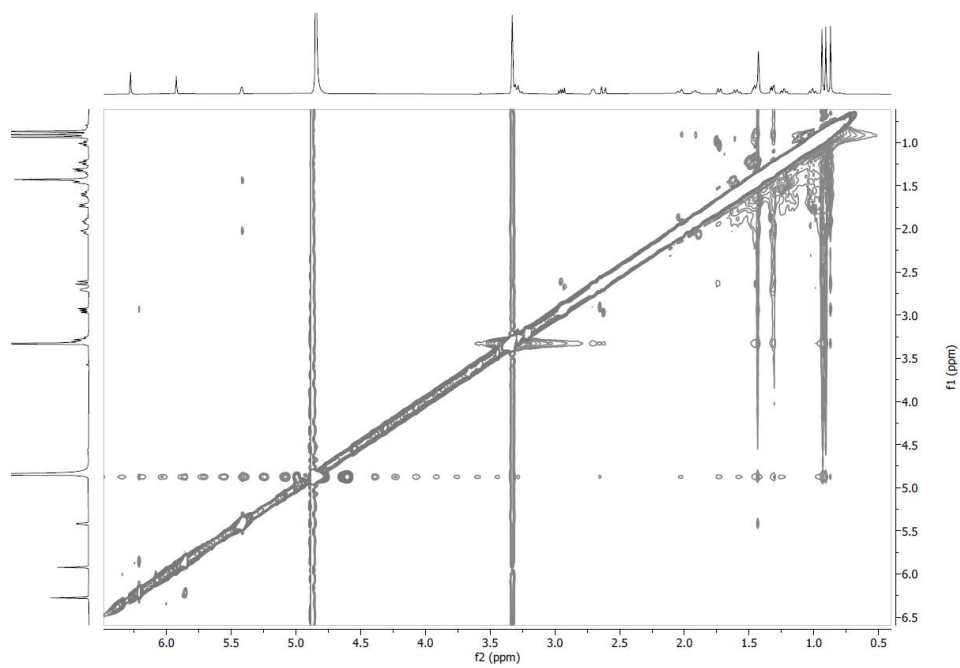

Figure S6. NOESY spectrum of compound 1 (CD<sub>3</sub>OD, 600 MHz)

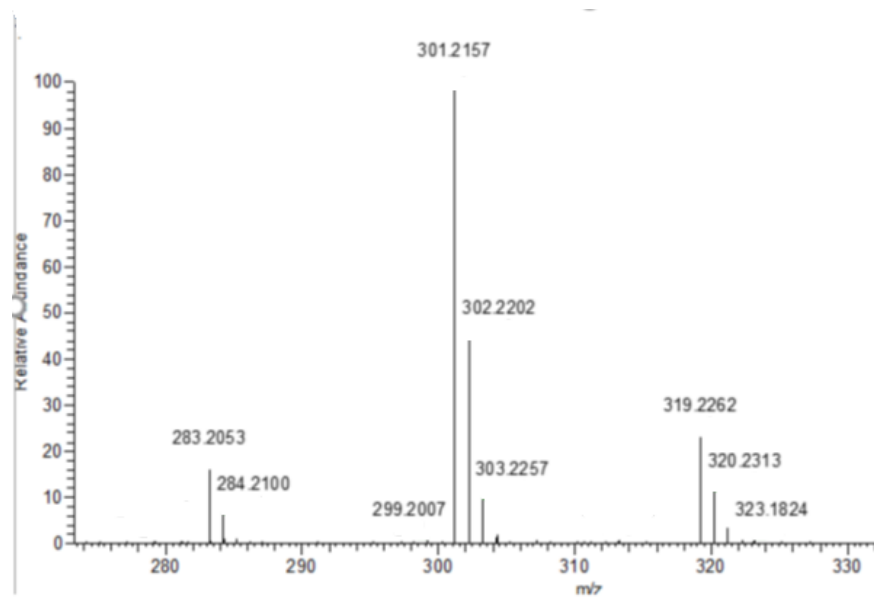

Figure S7. HRESIMS of compound 1.

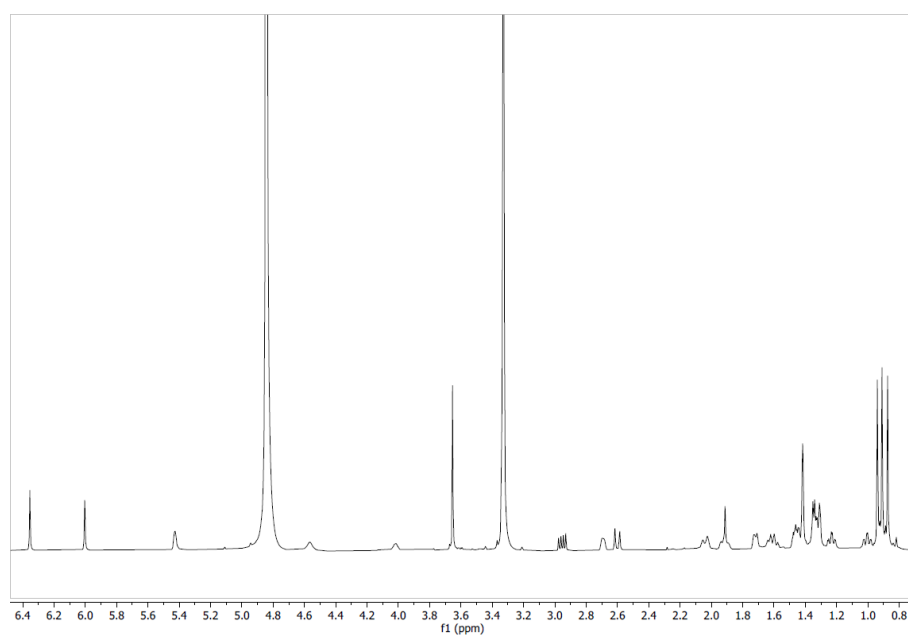

Figure S8. <sup>1</sup>H NMR spectrum of compound 2 (CD<sub>3</sub>OD, 600 MHz).

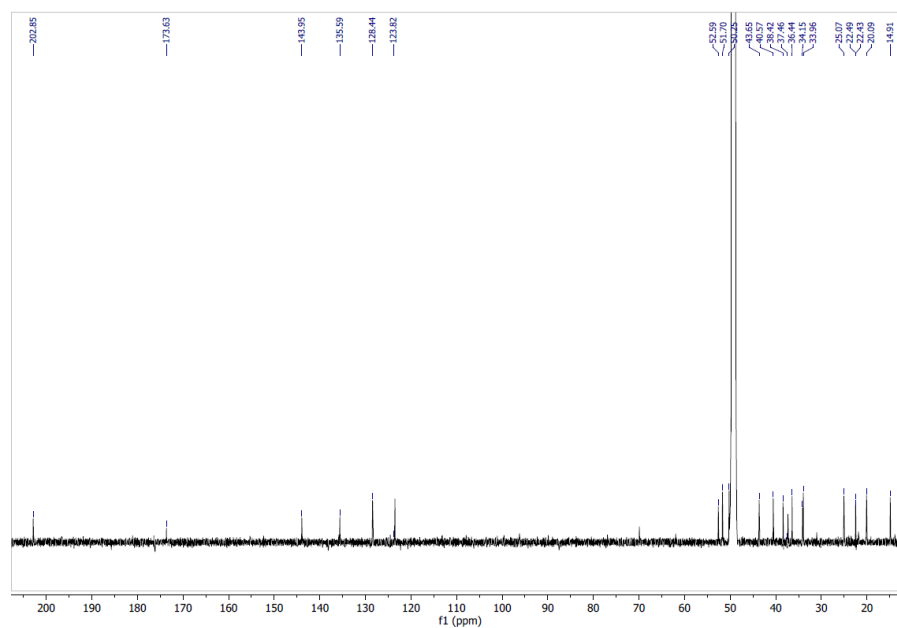

Figure S9.  $^{13}\text{C}$  NMR spectrum of compound 2 ( $\text{CD}_3\text{OD}$ , 600 MHz).

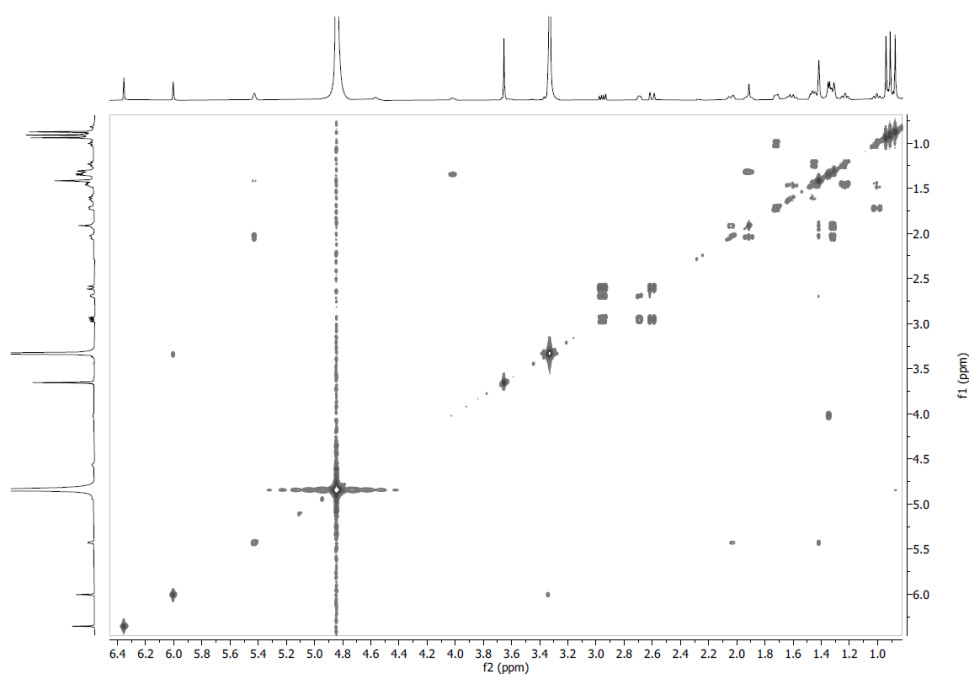

Figure S10. COSY spectrum of compound 2 ( $\text{CD}_3\text{OD}$ , 600 MHz).

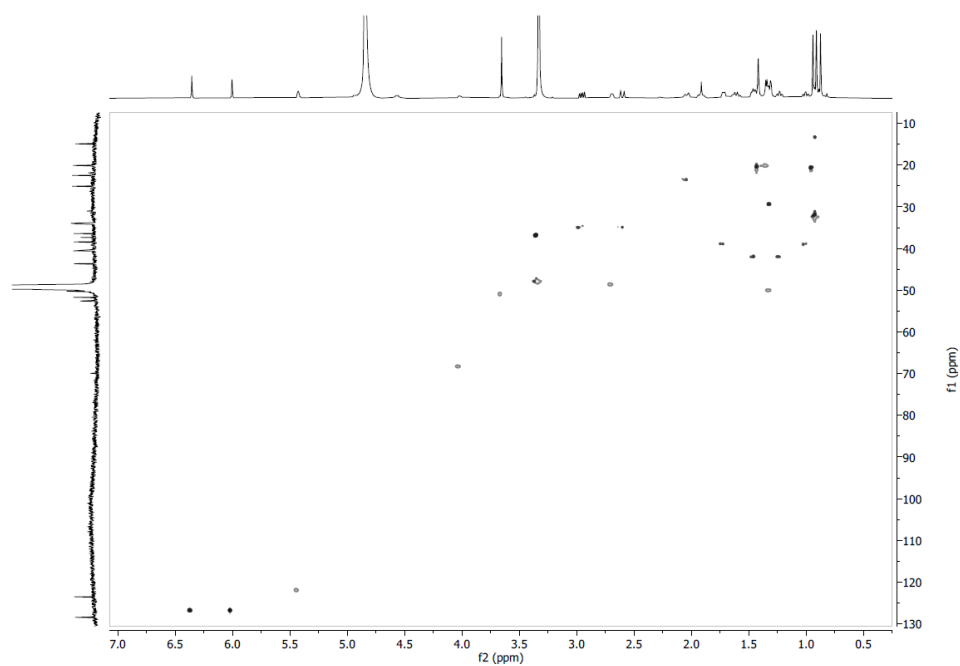

Figure S11. HSQC spectrum of compound 2 (CD<sub>3</sub>OD, 600 MHz).

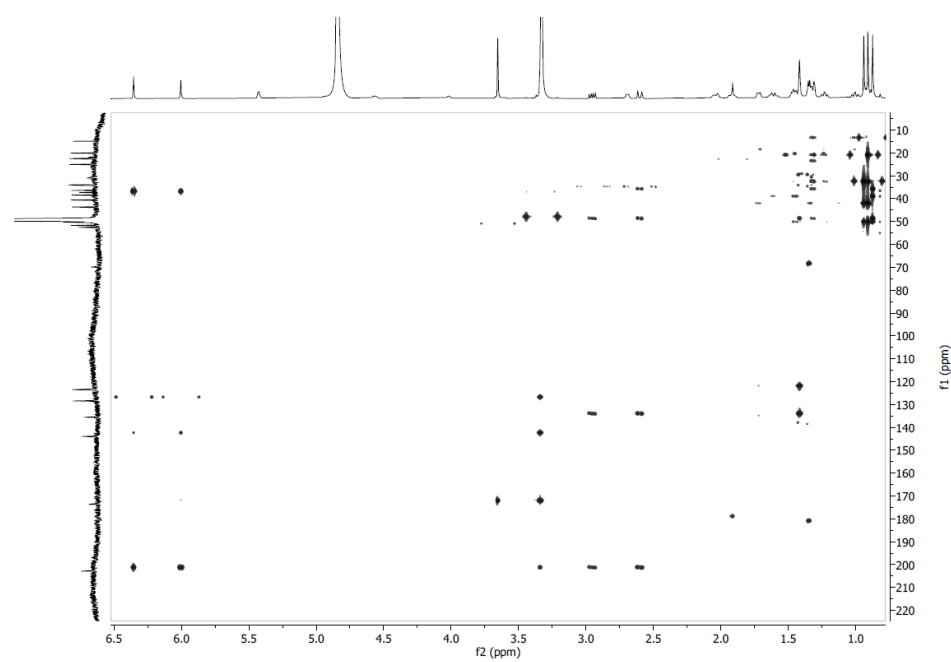

Figure S12. HMBC spectrum of compound 2 (CD<sub>3</sub>OD, 600 MHz).



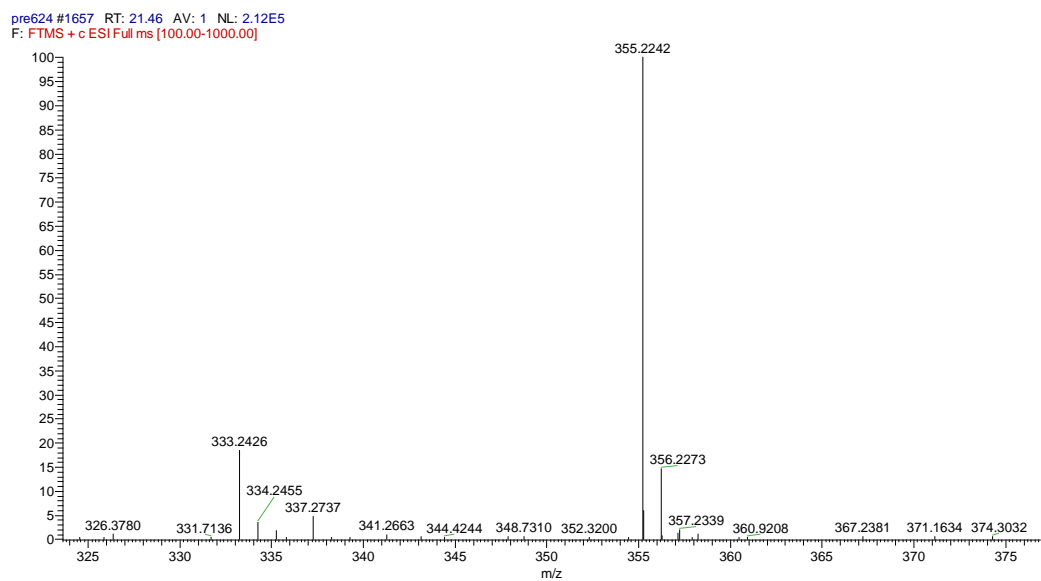

Figure S13. HRESIMS of compound 2.

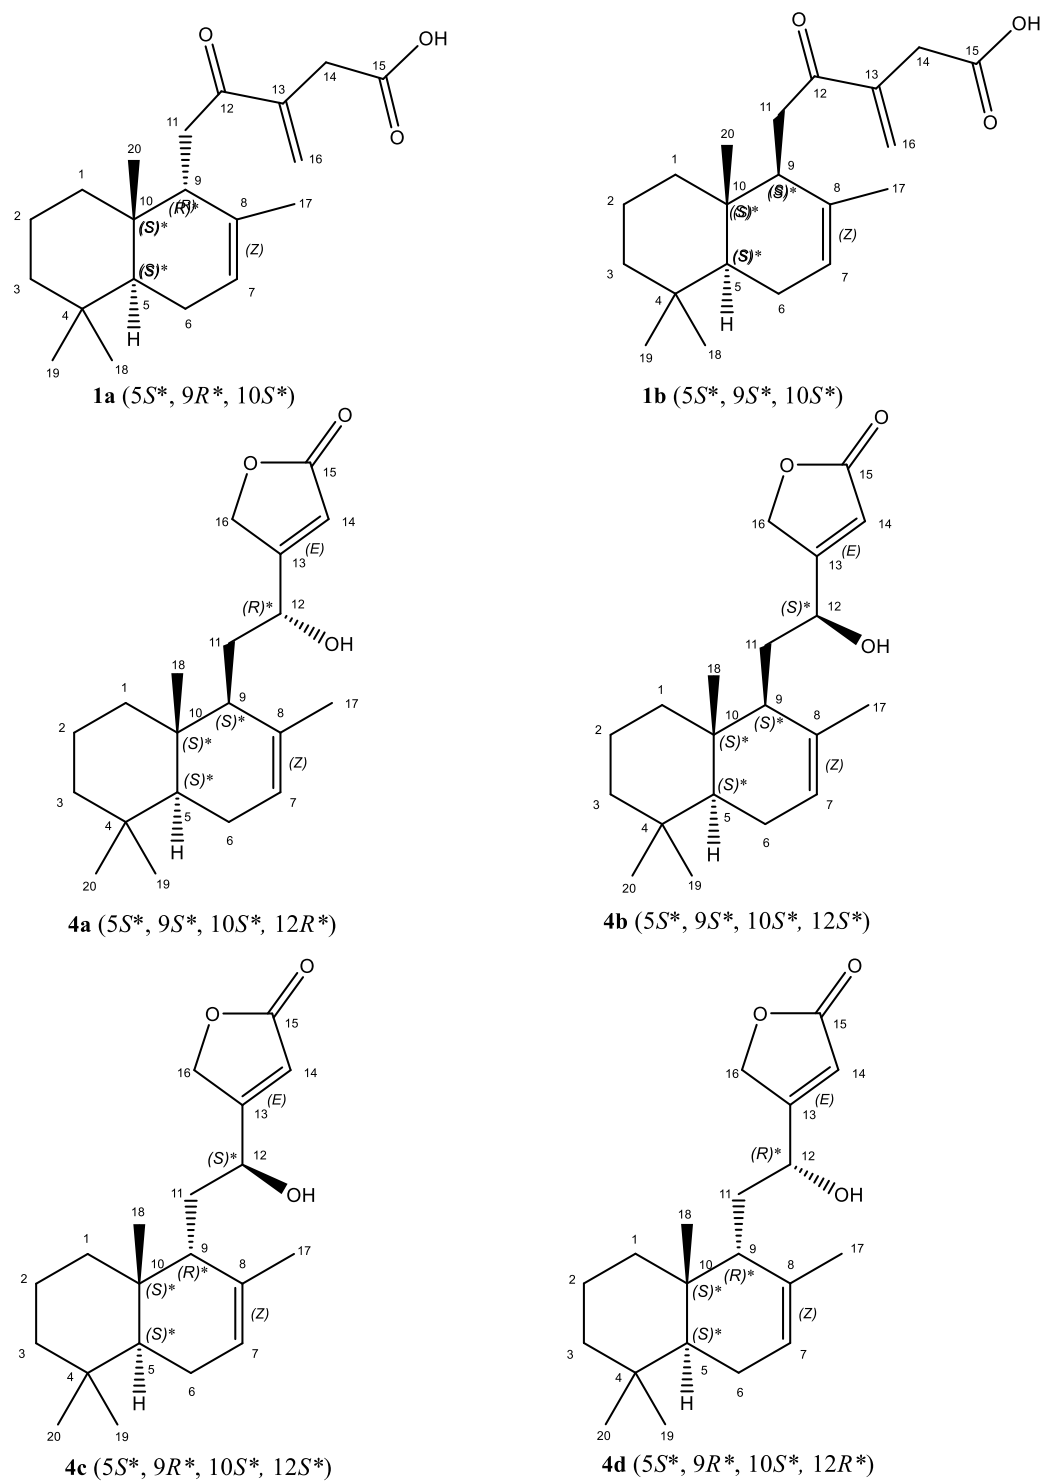

**Figure S14.** 2D structures of investigated stereoisomers of **1** and **4**.

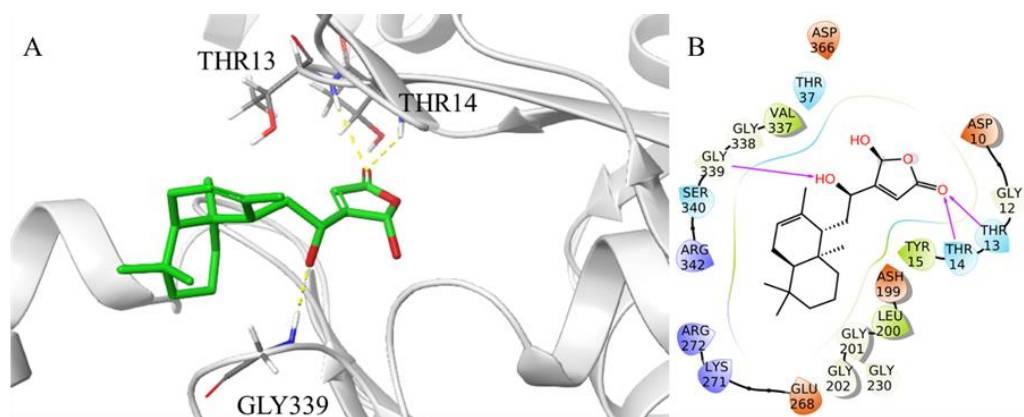

**Figure S15.** Binding pose and interaction of **3** docked to Hsp70 ATP binding site. (A) The protein is reported as grey ribbons and residues are colored by atom types; the ligand is reported as green capped sticks; H-bonds are presented as yellow dotted lines. (B) The ligand is surrounded by the protein residues represented as follows: the negatively charged residues are indicated in red, polar residues are in cyan, hydrophobic residues are shown in green; H-bonds are depicted as purple arrows.

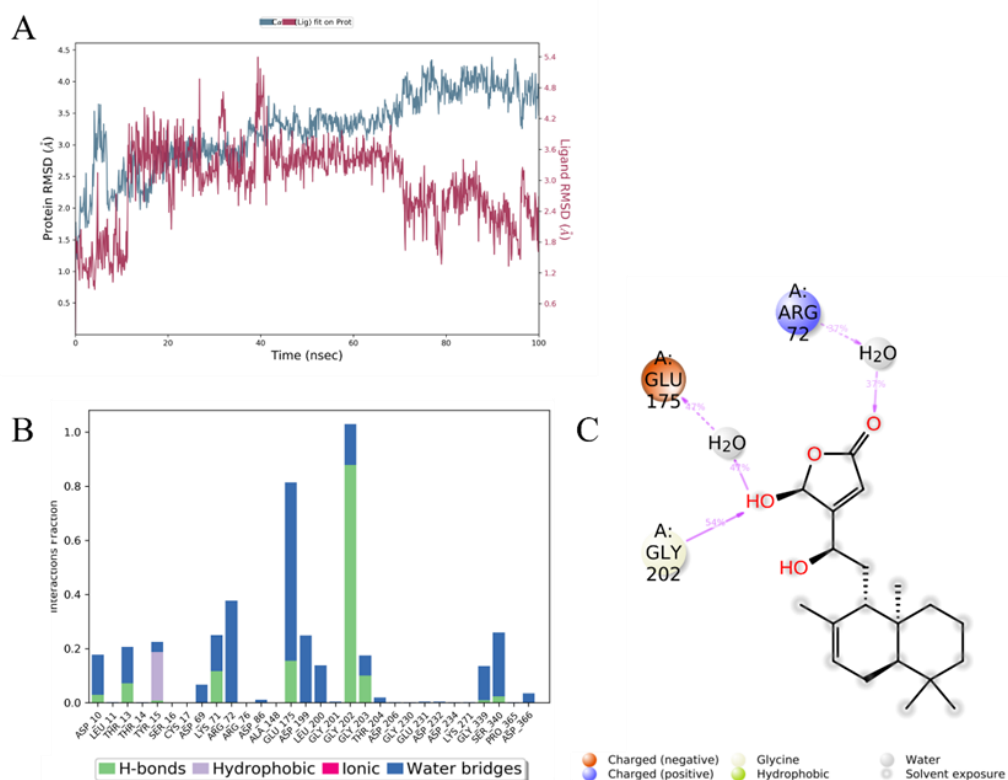

**Figure S16.** Molecular dynamic simulation results. (A) Root-mean square deviation (RMSD) plot for **3**/Hsp70 complex along 100 ns molecular dynamics simulation related to  $C\alpha$  positions of residues belonging to the protein backbone (blue) and the ligand (purple). (B) Protein-ligand interactions (or 'contacts') plot for **3**/Hsp70 complex along 100 ns molecular dynamics simulation. Contacts are categorized into four types: hydrogen bonds, hydrophobic, ionic and water bridges. (C) Ligand atom interactions with the protein residues. Interactions that occur more than 30.0% of the simulation time in the selected trajectory (0.00 through 100.00 ns), are shown.

**Table S1.**  $^1\text{H}$  experimental and calculated NMR chemical shifts for **1a-b**, with  $^a|\Delta\delta|(^1\text{H})$  and  $^c\text{MAE}$  values. Chemical shift data here reported were produced using benzene as reference compound for  $\text{sp}^2$  hydrogens, and tetramethylsilane (TMS) for  $\text{sp}^3$  hydrogens.

| $^1\text{H}$ | $\delta_{\text{exp}}(^1\text{H})$ ,<br>ppm | $\delta_{\text{calc}}(^1\text{H})$ , ppm |         | $ \Delta\delta (^1\text{H})$ , ppm |         |
|--------------|--------------------------------------------|------------------------------------------|---------|------------------------------------|---------|
|              | Position                                   | exp_1                                    | calc_1a | calc_2b                            | calc_1a |
| 1            | 1.74                                       | 1.00                                     | 1.64    | 0.74                               | 0.10    |
| 1            | 1.01                                       | 0.87                                     | 0.99    | 0.14                               | 0.02    |
| 2            | 1.46                                       | 1.68                                     | 1.69    | 0.22                               | 0.23    |
| 2            | 1.5                                        | 1.22                                     | 1.32    | 0.28                               | 0.18    |
| 3            | 1.46                                       | 1.19                                     | 1.24    | 0.27                               | 0.22    |
| 3            | 1.24                                       | 1.32                                     | 1.36    | 0.08                               | 0.12    |
| 5            | 1.33                                       | 1.38                                     | 1.38    | 0.05                               | 0.05    |
| 6            | 1.96                                       | 2.07                                     | 2.03    | 0.11                               | 0.07    |
| 6            | 2.05                                       | 2.07                                     | 2.13    | 0.02                               | 0.08    |
| 7            | 5.43                                       | 5.37                                     | 5.75    | 0.06                               | 0.02    |
| 9            | 2.71                                       | 2.56                                     | 2.81    | 0.15                               | 0.10    |
| 11           | 2.94                                       | 3.32                                     | 2.95    | 0.38                               | 0.01    |
| 11           | 2.63                                       | 2.31                                     | 2.61    | 0.32                               | 0.02    |
| 14           | 3.3                                        | 3.17                                     | 3.22    | 0.13                               | 0.08    |
| 16           | 5.94                                       | 6.14                                     | 6.46    | 0.20                               | 0.52    |
| 16           | 6.3                                        | 6.43                                     | 6.75    | 0.13                               | 0.11    |
| 17           | 1.46                                       | 1.61                                     | 1.34    | 0.15                               | 0.12    |
| 18           | 0.93                                       | 0.97                                     | 0.98    | 0.04                               | 0.05    |
| 19           | 0.96                                       | 0.87                                     | 0.88    | 0.09                               | 0.08    |
| 20           | 0.87                                       | 1.09                                     | 0.98    | 0.22                               | 0.11    |
| <b>MAE</b>   |                                            |                                          |         | 0.19                               | 0.11    |

**Table S2.**  $^{13}\text{C}$  experimental and calculated NMR chemical shifts for **1a-b**, with <sup>a</sup> $|\Delta\delta|(^{13}\text{C})$  and <sup>b</sup>MAE values. Chemical shift data here reported were produced using benzene as reference compound for  $\text{sp}^2$  carbons, and tetramethylsilane (TMS) for  $\text{sp}^3$  carbons.

| $^{13}\text{C}$ | $\delta_{\text{exp}}(^{13}\text{C})$ ,<br>ppm | $\delta_{\text{calc}}(^{13}\text{C})$ , ppm |         | $ \Delta\delta (^{13}\text{C})$ , ppm |         |
|-----------------|-----------------------------------------------|---------------------------------------------|---------|---------------------------------------|---------|
| Position        | exp_1                                         | calc_1a                                     | calc_1b | calc_1a                               | calc_1b |
| 1               | 38.7                                          | 37.6                                        | 39.8    | 1.1                                   | 1.1     |
| 2               | 18.0                                          | 20.8                                        | 20.9    | 2.8                                   | 2.9     |
| 3               | 41.7                                          | 42.1                                        | 41.7    | 0.4                                   | 0.0     |
| 4               | 33.0                                          | 33.8                                        | 34.2    | 0.8                                   | 1.2     |
| 5               | 50.1                                          | 42.1                                        | 49.6    | 8.0                                   | 0.5     |
| 6               | 23.5                                          | 26.5                                        | 26.2    | 3.0                                   | 2.7     |
| 7               | 122.0                                         | 126.3                                       | 126.3   | 4.3                                   | 4.3     |
| 8               | 134.0                                         | 138.9                                       | 138.9   | 4.9                                   | 4.9     |
| 9               | 48.6                                          | 47.1                                        | 49.0    | 1.5                                   | 0.4     |
| 10              | 36.0                                          | 37.8                                        | 37.5    | 1.8                                   | 1.5     |
| 11              | 35.0                                          | 39.7                                        | 36.9    | 4.7                                   | 1.9     |
| 12              | 203.0                                         | 201.3                                       | 201.3   | 1.7                                   | 1.7     |
| 13              | 144.0                                         | 144.8                                       | 144.8   | 0.8                                   | 0.8     |
| 14              | 37.2                                          | 39.5                                        | 38.6    | 2.3                                   | 1.4     |
| 15              | 174.5                                         | 171.2                                       | 171.2   | 3.3                                   | 3.3     |
| 16              | 125.5                                         | 134.5                                       | 134.5   | 9.0                                   | 9.0     |
| 17              | 21.1                                          | 24.1                                        | 23.8    | 3.0                                   | 2.7     |
| 18              | 32.0                                          | 33.6                                        | 33.9    | 1.6                                   | 1.9     |
| 19              | 21.0                                          | 23.1                                        | 22.9    | 2.1                                   | 1.9     |
| 20              | 13.0                                          | 22.8                                        | 16.7    | 9.8                                   | 3.7     |
| <b>MAE</b>      |                                               |                                             |         | 3.3                                   | 2.4     |

**Table S3.**  $^1\text{H}$  experimental and calculated NMR chemical shifts for **4a-d**, with  $^a|\Delta\delta|(^1\text{H})$  and  $^c\text{MAE}$  values. Chemical shift data here reported were produced using benzene as reference compound for  $\text{sp}^2$  hydrogens, and tetramethylsilane (TMS) for  $\text{sp}^3$  hydrogens.

| $^1\text{H}$ | $\delta_{\text{exp}}(^1\text{H})$ , ppm | $\delta_{\text{calc}}(^1\text{H})$ , ppm |         |         |         | $ \Delta\delta (^1\text{H})$ , ppm |         |         |         |
|--------------|-----------------------------------------|------------------------------------------|---------|---------|---------|------------------------------------|---------|---------|---------|
| Position     | exp_4                                   | calc_4a                                  | calc_4b | calc_4c | calc_4d | calc_4a                            | calc_4b | calc_4c | calc_4d |
| 1            | 0.87                                    | 1.02                                     | 1.11    | 1.71    | 1.54    | 0.15                               | 0.24    | 0.84    | 0.67    |
| 1            | 1.76                                    | 1.75                                     | 1.71    | 1.33    | 1.17    | 0.01                               | 0.05    | 0.43    | 0.59    |
| 2            | 1.42                                    | 1.36                                     | 1.36    | 1.43    | 1.35    | 0.06                               | 0.06    | 0.01    | 0.07    |
| 2            | 1.6                                     | 1.72                                     | 1.71    | 1.81    | 1.78    | 0.12                               | 0.11    | 0.21    | 0.18    |
| 3            | 1.45                                    | 1.37                                     | 1.37    | 1.44    | 1.37    | 0.08                               | 0.08    | 0.01    | 0.08    |
| 3            | 1.21                                    | 1.24                                     | 1.25    | 1.35    | 1.27    | 0.03                               | 0.04    | 0.14    | 0.06    |
| 5            | 1.25                                    | 1.36                                     | 1.38    | 1.65    | 1.64    | 0.11                               | 0.13    | 0.40    | 0.39    |
| 6            | 1.91                                    | 2.03                                     | 2.05    | 2.22    | 2.15    | 0.12                               | 0.14    | 0.31    | 0.24    |
| 6            | 2.02                                    | 2.15                                     | 2.13    | 2.16    | 2.10    | 0.13                               | 0.11    | 0.14    | 0.08    |
| 7            | 5.48                                    | 5.46                                     | 5.49    | 5.67    | 5.53    | 0.02                               | 0.01    | 0.19    | 0.05    |
| 9            | 1.87                                    | 2.38                                     | 2.28    | 1.72    | 1.51    | 0.51                               | 0.41    | 0.15    | 0.36    |
| 11           | 1.71                                    | 1.61                                     | 1.56    | 2.01    | 1.96    | 0.16                               | 0.15    | 0.24    | 0.19    |
| 11           | 1.77                                    | 1.46                                     | 1.82    | 1.83    | 1.60    | 0.25                               | 0.05    | 0.12    | 0.11    |
| 12           | 4.71                                    | 4.60                                     | 4.44    | 5.44    | 4.91    | 0.11                               | 0.27    | 0.73    | 0.20    |
| 14           | 6.05                                    | 5.72                                     | 5.70    | 5.68    | 5.72    | 0.33                               | 0.35    | 0.37    | 0.33    |
| 16           | 5.01                                    | 4.89                                     | 4.90    | 4.91    | 4.91    | 0.12                               | 0.11    | 0.10    | 0.10    |
| 16           | 5.03                                    | 4.86                                     | 4.93    | 4.90    | 4.95    | 0.17                               | 0.10    | 0.13    | 0.08    |
| 17           | 1.78                                    | 1.70                                     | 1.66    | 1.87    | 1.79    | 0.08                               | 0.12    | 0.09    | 0.01    |
| 18           | 0.89                                    | 0.86                                     | 0.87    | 0.91    | 0.87    | 0.03                               | 0.02    | 0.02    | 0.02    |
| 19           | 0.93                                    | 0.97                                     | 0.99    | 1.01    | 0.98    | 0.04                               | 0.06    | 0.08    | 0.05    |
| 20           | 0.83                                    | 0.93                                     | 0.97    | 1.04    | 1.04    | 0.10                               | 0.14    | 0.21    | 0.21    |
| <b>MAE</b>   |                                         |                                          |         |         |         | 0.13                               | 0.13    | 0.23    | 0.19    |

**Table S4.**  $^{13}\text{C}$  experimental and calculated NMR chemical shifts for **4a-d**, with <sup>a</sup> $|\Delta\delta|(^{13}\text{C})$  and <sup>b</sup>MAE values. Chemical shift data here reported were produced using benzene as reference compound for  $\text{sp}^2$  carbons, and tetramethylsilane (TMS) for  $\text{sp}^3$  carbons.

| $^{13}\text{C}$ | $\delta_{\text{exp}}(^{13}\text{C}),$<br>ppm | $\delta_{\text{calc}}(^{13}\text{C}),$ ppm |         |         |         | $ \Delta\delta  (^{13}\text{C}),$ ppm |         |         |         |
|-----------------|----------------------------------------------|--------------------------------------------|---------|---------|---------|---------------------------------------|---------|---------|---------|
| Position        | exp_4                                        | calc_4a                                    | calc_4b | calc_4c | calc_4d | calc_4a                               | calc_4b | calc_4c | calc_4d |
| 1               | 39.0                                         | 39.3                                       | 39.5    | 37.5    | 36.0    | 0.3                                   | 0.5     | 1.5     | 3.0     |
| 2               | 18.4                                         | 20.8                                       | 20.8    | 20.9    | 20.9    | 2.4                                   | 2.4     | 2.5     | 2.5     |
| 3               | 42.0                                         | 41.6                                       | 41.6    | 42.3    | 42.2    | 0.4                                   | 0.4     | 0.3     | 0.2     |
| 4               | 36.4                                         | 34.2                                       | 34.0    | 34.5    | 34.1    | 2.2                                   | 2.4     | 1.9     | 2.3     |
| 5               | 50.1                                         | 49.5                                       | 49.8    | 45.2    | 42.0    | 0.6                                   | 0.3     | 4.9     | 8.1     |
| 6               | 23.4                                         | 26.3                                       | 26.4    | 26.7    | 26.9    | 2.9                                   | 3.0     | 3.3     | 3.5     |
| 7               | 122.3                                        | 127.5                                      | 127.4   | 130.2   | 129.0   | 5.2                                   | 5.1     | 7.9     | 6.7     |
| 8               | 134.8                                        | 138.4                                      | 138.3   | 140.8   | 138.9   | 3.6                                   | 3.5     | 6.0     | 4.1     |
| 9               | 50.3                                         | 49.6                                       | 52.3    | 51.0    | 51.5    | 0.7                                   | 2.0     | 0.7     | 1.2     |
| 10              | 36.0                                         | 37.9                                       | 38.9    | 38.2    | 38.7    | 1.9                                   | 2.9     | 2.2     | 2.7     |
| 11              | 33.3                                         | 35.2                                       | 32.8    | 36.5    | 40.7    | 1.9                                   | 0.5     | 3.2     | 7.4     |
| 12              | 69.1                                         | 70.0                                       | 71.3    | 69.9    | 69.7    | 0.9                                   | 2.2     | 0.8     | 0.6     |
| 13              | 176.0                                        | 179.9                                      | 178.8   | 179.8   | 179.5   | 3.9                                   | 2.8     | 3.8     | 3.5     |
| 14              | 114.5                                        | 117.0                                      | 117.3   | 115.8   | 116.5   | 2.5                                   | 2.8     | 1.3     | 2.0     |
| 15              | 176.5                                        | 172.5                                      | 172.6   | 172.9   | 172.8   | 4.0                                   | 3.9     | 3.6     | 3.7     |
| 16              | 71.5                                         | 70.3                                       | 70.5    | 69.9    | 70.1    | 1.2                                   | 1.0     | 1.6     | 1.4     |
| 17              | 21.4                                         | 23.6                                       | 24.5    | 25.2    | 25.7    | 2.2                                   | 3.1     | 3.8     | 4.3     |
| 18              | 32.0                                         | 33.8                                       | 33.9    | 33.9    | 33.3    | 1.8                                   | 1.9     | 1.9     | 1.3     |
| 19              | 21.0                                         | 23.1                                       | 22.9    | 23.6    | 23.0    | 2.1                                   | 1.9     | 2.6     | 2.0     |
| 20              | 13.0                                         | 15.9                                       | 15.5    | 23.6    | 22.8    | 2.9                                   | 2.5     | 10.6    | 9.8     |
| <b>MAE</b>      |                                              |                                            |         |         |         | 2.2                                   | 2.3     | 3.2     | 3.5     |
